# Supplementary material for: A comprehensive workflow for target adaptive sampling long-read sequencing applied to hereditary cancer patient genomes
Source: bioRxiv or medRxiv preprint supplement (doi:10.1101/2023.05.30.23289318), 2023-06-01
Supplement: Supplementary file [file media-6.pdf]

## NCBN Controls WGS Consortium

Hatsue Ishibashi-Ueda<sup>1</sup>, Tsutomu Tomita<sup>1</sup>, Michio Noguchi<sup>1</sup>, Ayako Takahashi<sup>1</sup>, Yu-ichi Goto<sup>2</sup>, Sumiko Yoshida<sup>3</sup>, Kotaro Hattori<sup>3</sup>, Ryo Matsumura<sup>3</sup>, Aritoshi Iida<sup>4</sup>, Yutaka Maruoka<sup>5</sup>, Hiroyuki Gatanaga<sup>6</sup>, Masaya Sugiyama<sup>7</sup>, Satoshi Suzuki<sup>5</sup>, Kengo Miyo<sup>8</sup>, Yoichi Matsubara<sup>9</sup>, Akihiro Umezawa<sup>10</sup>, Kenichiro Hata<sup>11</sup>, Tadashi Kaname<sup>12</sup>, Kouichi Ozaki<sup>13</sup>, Haruhiko Tokuda<sup>13</sup>, Hiroshi Watanabe<sup>13</sup>, Shumpei Niida<sup>13</sup>, Eisei Noiri<sup>14</sup>, Koji Kitajima<sup>14</sup>, Yosuke Omae<sup>14,15</sup>, Reiko Miyahara<sup>14</sup>, Hideyuki Shimanuki<sup>14</sup>, Yosuke Kawai<sup>15</sup>, and Katsushi Tokunaga<sup>14,15</sup>

<sup>1</sup> NCVC Biobank, National Cerebral and Cardiovascular Center, Suita, Osaka 564-8565, Japan

<sup>2</sup> Medical Genome Center, National Center of Neurology and Psychiatry, Kodaira, Tokyo 187-8551, Japan

<sup>3</sup> Department of Bioresources, Medical Genome Center, National Center of Neurology and Psychiatry, Kodaira, Tokyo 187-8551, Japan

<sup>4</sup> Department of Clinical Genome Analysis, Medical Genome Center, National Center of Neurology and Psychiatry, Kodaira, Tokyo 187-8551, Japan

<sup>5</sup> NCGM Biobank, National Center for Global Health and Medicine, Shinjuku-ku, Tokyo 162-8655, Japan

<sup>6</sup> AIDS Clinical Center, National Center for Global Health and Medicine, Shinjuku-ku, Tokyo 162-8655, Japan

<sup>7</sup> Genome Medical Sciences Project (Konodai), Research Institute, National Center for Global Health and Medicine, Ichikawa, Chiba 272-8516, Japan

<sup>8</sup> Center for Medical Informatics and Intelligence, National Center for Global Health and Medicine, Shinjuku-ku, Tokyo 162-8655, Japan

<sup>9</sup> National Center for Child Health and Development, Setagaya-ku, Tokyo 157-8535, Japan

<sup>10</sup> Center for Regenerative Medicine, National Center for Child Health and Development, Setagaya-ku, Tokyo 157-8535, Japan

<sup>11</sup> Department of Maternal-Fetal Biology, National Center for Child Health and Development, Setagaya-ku, Tokyo 157-8535, Japan

<sup>12</sup> Department of Genome Medicine, National Center for Child Health and Development, Setagaya-ku, Tokyo 157-8535, Japan

<sup>13</sup> Medical Genome Center, Research Institute, National Center for Geriatrics and Gerontology, Obu, Aichi 474-8511, Japan

<sup>14</sup> Central Biobank, National Center Biobank Network, Shinjuku-ku, Tokyo 162-8655, Japan

<sup>15</sup> Genome Medical Science Project (Toyama), Research Institute, National Center for Global Health and Medicine, Shinjuku-ku, Tokyo 162-8655, Japan
